# Supplementary figures and images for: An in Vitro and in Vivo Study of the Effect of Dexamethasone on Immunoinhibitory Function of Induced Pluripotent Stem Cell-Derived Mesenchymal Stem Cells
Source: PubMed Central journal article supplement — Cell Transplant. 2018 Jul 30;27(9):1340–51. doi: 10.1177/0963689718780194 (PMC6168992; doi:10.1177/0963689718780194), 2018-07-30

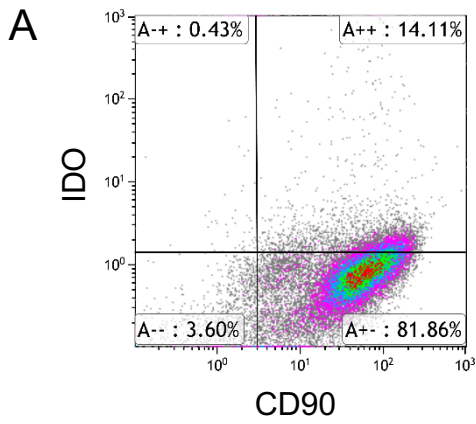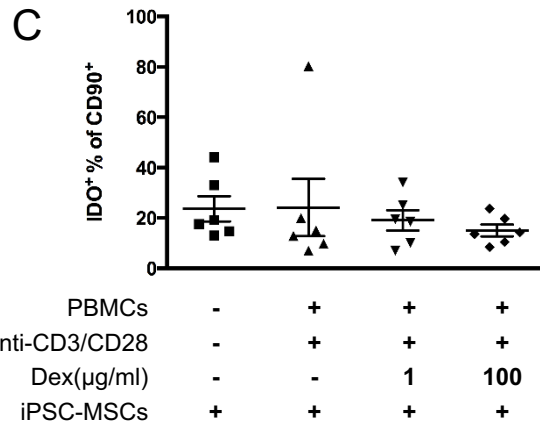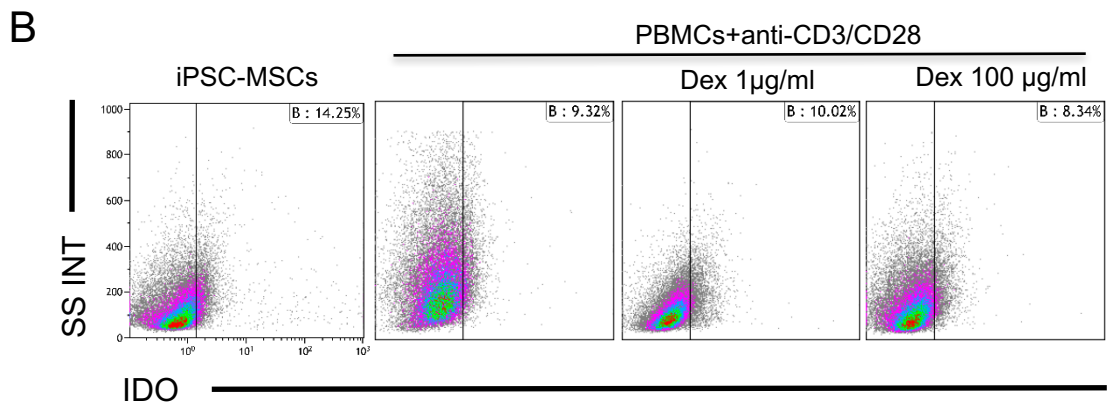

Supplementary Figure 1

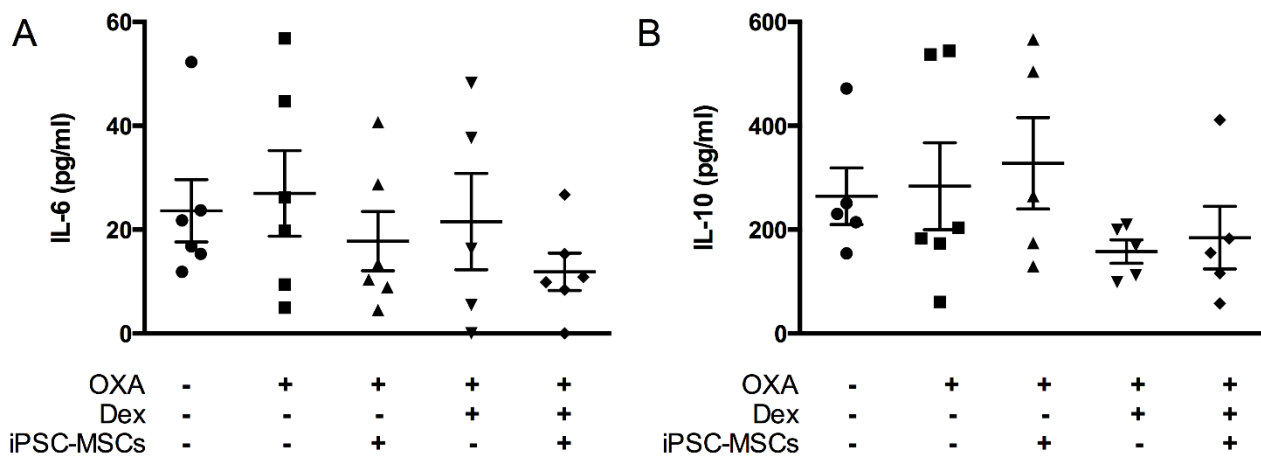

Supplementary Figure 2

Supplement: 780194_Supplementary_Material.pdf [file 780194_Supplementary_Material.pdf]
